# Supplementary material for: Insights into the Lignocellulose-Degrading Enzyme System of Humicola grisea var. thermoidea Based on Genome and Transcriptome Analysis
Source: PubMed Central journal article supplement (PMC8557918; doi:10.1128/spectrum.01088-21), 2021-09-15
Supplement: spectrum01088-21_supp_2_seq2.pdf [file spectrum01088-21_supp_2_seq2.pdf]

## Supplemental Material 2

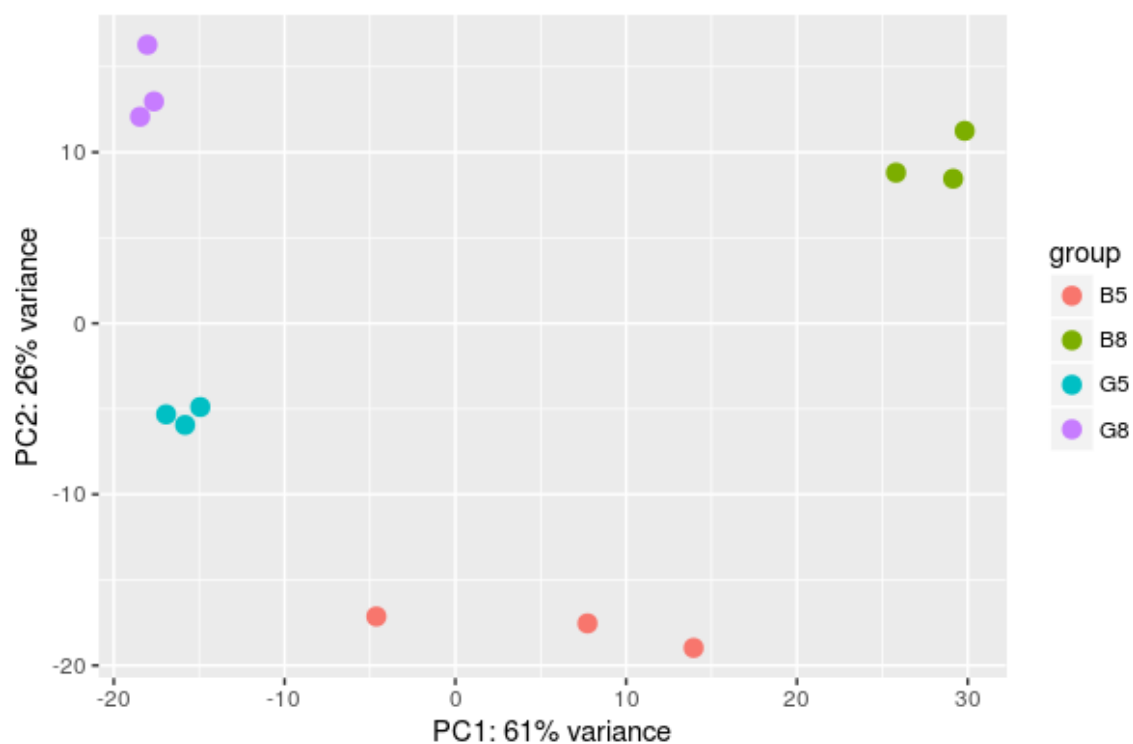

Supplementary Figure 1. **Principal component analysis (PCA) of genome-wide transcriptional response of *H. grisea* grown in sugarcane bagasse and glucose at pH 5 or pH 8.** The log-transformed counts from biological replicates. B5: sugarcane bagasse pH 5, B8: sugarcane bagasse pH 8, G5: glucose pH 5 and G8: glucose pH 8.
